# Supplementary material for: Protective Effects of Astaxanthin on Ochratoxin A-Induced Liver Injury: Effects of Endoplasmic Reticulum Stress and Mitochondrial Fission–Fusion Balance
Source: MDPI journal article supplement (doi:10.3390/toxins16020068), 2024-01-30
Supplement: s1 [file s1]

# Supplementary Materials: Protective Effects of Astaxanthin on Ochratoxin A-Induced Liver Injury: Effects of Endoplasmic Reticulum Stress and Mitochondrial Fission–Fusion Balance

**Table S1.** The primers that were applied in this research.

| Primer           | Sequence                        | Amplicon size (bp) |
|------------------|---------------------------------|--------------------|
| <i>AHR-F</i>     | 5'TTCAGGAAAGCAGAACAGCAA 3'      | 96bp               |
| <i>AHR-R</i>     | 5'TCACAATAATACGAAGCCAT 3'       |                    |
| <i>CAR-F</i>     | 5'ACTTCACCTGCCCCCTTTGCC 3'      | 105bp              |
| <i>CAR-R</i>     | 5'CCTTCCTCATCCCCACGTCCA 3'      |                    |
| <i>PXR-F</i>     | 5'CCCTCAAGAGCTACATCGACCA 3'     | 108bp              |
| <i>PXR-R</i>     | 5'TGTTCTCCATCTTCAGCGTCT 3'      |                    |
| <i>CYP1A1-F</i>  | 5'ATGCTCGTTTCAGTGCCTTCGT 3'     | 199bp              |
| <i>CYP1A1-R</i>  | 5'GTGTCAAAGCCTGCCCCAA 3'        |                    |
| <i>CYP1A5-F</i>  | 5'AACCCAGAGCGTTTCCTCAA 3'       | 120bp              |
| <i>CYP1A5-R</i>  | 5'CTCCCACTTGCTATGTTTTCC 3'      |                    |
| <i>CYP2C18-F</i> | 5'AACCTCCATACGAAGCTGCAA 3'      | 243bp              |
| <i>CYP2C18-R</i> | 5'TGTGCCTTTGAAGACTTTCTCA 3'     |                    |
| <i>CYP2D6-F</i>  | 5'GAACCCTGCTTACATCCGAGA 3'      | 175bp              |
| <i>CYP2D6-R</i>  | 5'CATGAACAGGAACGCCCAT 3'        |                    |
| <i>CYP3A9-F</i>  | 5'GAGATGAGACTGTGAATGG 3'        | 199bp              |
| <i>CYP3A9-R</i>  | 5'TTTTTTTAATGGTGATAGAAC 3'      |                    |
| <i>GRP78-F</i>   | 5'GAATCGGCTAACACCAGAGGA 3'      | 118bp              |
| <i>GRP78-R</i>   | 5'CGCATAGCTCTCCAGCTCATT 3'      |                    |
| <i>GRP94-F</i>   | 5'CAAAGACATGCTGAGGCGAGT 3'      | 186bp              |
| <i>GRP94-R</i>   | 5'TCCACCTTTGCATCCAGGTCA 3'      |                    |
| <i>ATF4-F</i>    | 5'GAATCGGCTAACACCAGAGGA 3'      | 118bp              |
| <i>ATF4-R</i>    | 5'CGCATAGCTCTCCAGCTCATT 3'      |                    |
| <i>ATF6-F</i>    | 5'CGTCGTCTGAACCACTTACTGA 3'     | 101bp              |
| <i>ATF6-R</i>    | 5'CCTTCTTTCTAACAGCCACAC 3'      |                    |
| <i>eIF2α-F</i>   | 5'CAGGGGCACCCAACCTACAA 3'       | 121bp              |
| <i>eIF2α-R</i>   | 5'CGGGCACAAATACTTTTCATCATCT 3'  |                    |
| <i>IRE1-F</i>    | 5'CTACAGGTCGTCCTCACATC 3'       | 101bp              |
| <i>IRE1-R</i>    | 5'ATCAGTCCTTCTGCTCCCATCT 3'     |                    |
| <i>PERK-F</i>    | 5'TCATCCAGCCTCAGTAAACC 3'       | 164bp              |
| <i>PERK-R</i>    | 5'ACAACATCCTCGCCCAGT 3'         |                    |
| <i>CHOP-F</i>    | 5'GCTGGATGAGACACTGAATGCAGA G 3' | 149bp              |
| <i>CHOP-R</i>    | 5'CACGCTTCCGCTTTGTCCTCTG 3'     |                    |
| <i>DRP1-F</i>    | 5'TCGTGCTCCTCCTGGTGTTCC 3'      | 161bp              |
| <i>DRP1-R</i>    | 5'TTCTGTGCGTTGCCACCGATG 3'      |                    |
| <i>MFF-F</i>     | 5'GGCTCCTCAGAATGCTGACCTTG 3'    | 91bp               |
| <i>MFF-R</i>     | 5'CACTACAATCCGCTCTGGAACCTG 3'   |                    |
| <i>OPA1-F</i>    | 5'TGTATGTGATGAGATAGCCTGG 3'     | 115bp              |
| <i>OPA1-R</i>    | 5'CCAGCTCCACTGTACAAGACA 3'      |                    |
| <i>MFN1-F</i>    | 5'CCTGCTGCAACTCCAGAGAACAC 3'    | 115bp              |
| <i>MFN1-R</i>    | 5'TCACTCCGCCAACAACGATGATG 3'    |                    |
| <i>MFN2-F</i>    | 5'AGCTGGCTGCGTACATCAATGAG 3'    | 150bp              |

|                  |                            |      |
|------------------|----------------------------|------|
| <i>MFN2-R</i>    | 5'GCCTTGCCAACACTTCACTAATGC | 93bp |
|                  | 3'                         |      |
| <i>β-actin-F</i> | 5'CCAGCCATGTATGTAGCCATCCAG |      |
|                  | 3'                         |      |
| <i>β-actin-R</i> | 5'GGTAACACCATCACCAGAGTCCAT |      |
|                  | C 3'                       |      |

**Table S2.** The antigens that were used in the current research.

| Antibody name  | Dilution ratio | kDa | Resource                         |
|----------------|----------------|-----|----------------------------------|
| <i>GRP78</i>   | 1:1000         | 78  | Proteintech Biotechnology, China |
| <i>ATF6</i>    | 1:1000         | 100 | Proteintech Biotechnology, China |
| <i>CHOP</i>    | 1:1000         | 30  | Proteintech Biotechnology, China |
| <i>DRP1</i>    | 1:500          | 80  | Abclonal Technology, China       |
| <i>OPA1</i>    | 1:1000         | 100 | Abclonal Technology, China       |
| <i>MFN1</i>    | 1:1000         | 84  | Abclonal Technology, China       |
| <i>MFN2</i>    | 1:1000         | 86  | Abclonal Technology, China       |
| <i>β-actin</i> | 1:1000         | 42  | Abclonal Technology, China       |
